# Supplementary material for: Comparative analysis of C‐type lectin domain proteins in the ghost moth, Thitarodes xiaojinensis (Lepidoptera: Hepialidae)
Source: PubMed Central journal article supplement (PMC7379682; doi:10.1111/1744-7917.12564), 2018-02-22
Supplement: INS-26-453-s002.pdf [file INS-26-453-s002.pdf]

Table S1. Functions of the CTLDPs with one CRD in Dipteran

| Name <sup>a</sup>              | Tissue <sup>b</sup>      |                          |                          |                  |                               | Agglutination <sup>c</sup>                                                             | Inducibility <sup>c</sup>                      |               |                                                 | binding <sup>d</sup>                                                  | proPO activation  | Melanization                 | Reference                                                                    |
|--------------------------------|--------------------------|--------------------------|--------------------------|------------------|-------------------------------|----------------------------------------------------------------------------------------|------------------------------------------------|---------------|-------------------------------------------------|-----------------------------------------------------------------------|-------------------|------------------------------|------------------------------------------------------------------------------|
|                                | Ep                       | FB                       | Hc                       | Mg               | others                        |                                                                                        | Bacteria                                       | fungi         | others                                          |                                                                       |                   |                              |                                                                              |
| DL1-3, Dm lectin-24A           | lectin-24A               | 1-3, lectin-24A          | 1, 3, lectin-24A         | lectin-24A       | SG, tracheae (1);             | Ec (1-3);                                                                              | -                                              | -             | parasitic wasps (lectin-24A)                    | galactose (1-3); - (lectin-24A)                                       | -                 | Yes (2,3); - (1, lectin-24A) | (Ao et al., 2007; Keebaugh and Schlenke, 2012; Tanji et al., 2006)           |
| AgCTL4, MA2                    | -                        | -                        | -                        | -                | -                             | -                                                                                      | Ec, Sa                                         | -             | -                                               | -                                                                     | -                 | Inhibitor                    | (Osta et al., 2004; Schnitger et al., 2009)                                  |
| AamosGCT L-1, 3, CLSP1, 2      | -                        | CLSP1, 2                 | No (CLSP1, 2)            | mosGC TL-1       | SG (mosGCTL -1, )             | Bb (CLSP2)                                                                             | EcI (CLSP1, 2)                                 | Bb (CLSP1, 2) | WNV (mosGCTL-1); DENV-2 (mosGCTL-3); Pg (CLSP2) | WNV envelope protein (mosGCTL-1); DENV-2 envelope protein (mosGCTL-3) | Inhibitor (CLSP2) | -                            | (Cheng et al., 2010; Liu et al., 2014; Shin et al., 2011; Wang et al., 2015) |
| AsCTLMA1 1, 15, GA5, CTL15, 16 | MA11, 15, GA5, CTL15, 16 | MA11, 15, GA5, CTL15, 16 | MA11, 15, GA5, CTL15, 16 | MA11, GA5, CTL16 | MT (MA11, 15, GA5, CTL15, 16) | Sa (MA15, GA5, CTL15), MI (MA15); Bc (GA5, CTL15); Bs, Ec, Sm, Pa (CTL15); No (CTL16); | Ec (MA11, 15, GA5, CTL15); MI (GA5, CTL15, 16) | -             | -                                               | LPS, PG, LTA, mannan,                                                 | -                 | -                            | (Shi et al., 2014)                                                           |

<sup>a</sup> DL, *Drosophila lectin*; Dm, *Drosophila melanogaster*; Ag, *Anopheles gambiae*; Aa, *Aedes aegypti*; As, *Armigeres subalbatus*;

<sup>b</sup> Ep, epidermis; FB, fat body; Hc, hemocyte; Mg, midgut; SG, silk gland; MT, Malpighian tubule;

<sup>c</sup> MI, *Micrococcus luteus*; Sa, *Staphylococcus aureus*; Bs, *Bacillus subtilis*; Bc, *Bacillus cereus*; Ec, *Escherichia coli*; Sm, *Serratia marcescens*; Pa, *Pseudomonas*

*aeruginosa*; Sc, *Saccharomyces cerevisiae*; WNV, West Nile virus; Ecl, *Enterobacter cloacae*; Bb, *Beauveria bassiana*; Pg, *Plasmodium gallinaceum*;

<sup>d</sup> LPS, lipopolysaccharide; PG, peptidoglycan; LTA, lipoteichoic acid;

Ao, J., Ling, E., Yu, X.Q., 2007. *Drosophila* C-type lectins enhance cellular encapsulation. *Mol. Immunol.* 44, 2541-2548.

Cheng, G., Cox, J., Wang, P., Krishnan, M.N., Dai, J., Qian, F., Anderson, J.F., Fikrig, E., 2010. A C-Type Lectin Collaborates with a CD45 Phosphatase Homolog to Facilitate West Nile Virus Infection of Mosquitoes. *Cell* 142, 714-725.

Keebaugh, E.S., Schlenke, T.A., 2012. Adaptive evolution of a novel *Drosophila* lectin induced by parasitic wasp attack. *Mol. Biol. Evol.* 29, 565-577.

Liu, Y., Zhang, F., Liu, J., Xiao, X., Zhang, S., Qin, C., Xiang, Y., Wang, P., Cheng, G., 2014. Transmission-blocking antibodies against mosquito C-type lectins for dengue prevention. *PLoS Pathog* 10, e1003931.

Osta, M.A., Christophides, G.K., Kafatos, F.C., 2004. Effects of mosquito genes on *Plasmodium* development. *Science* 303, 2030-2032.

Schnitger, A.K., Yassine, H., Kafatos, F.C., Osta, M.A., 2009. Two C-type lectins cooperate to defend *Anopheles gambiae* against Gram-negative bacteria. *J. Biol. Chem.* 284, 17616-17624.

Shi, X.-Z., Kang, C.-J., Wang, S.-J., Zhong, X., Beerntsen, B.T., Yu, X.-Q., 2014. Functions of *Armigeres subalbatus* C-type lectins in innate immunity. *Insect Biochem. Mol. Biol.* 52, 102-114.

Shin, S.W., Zou, Z., Raikhel, A.S., 2011. A new factor in the *Aedes aegypti* immune response: CLSP2 modulates melanization. *EMBO Rep* 12, 938-943.

Tanji, T., Ohashi-Kobayashi, A., Natori, S., 2006. Participation of a galactose-specific C-type lectin in *Drosophila* immunity. *Biochem. J.* 396, 127-138.

Wang, Y.H., Hu, Y., Xing, L.S., Jiang, H., Hu, S.N., Raikhel, A.S., Zou, Z., 2015. A Critical Role for CLSP2 in the Modulation of Antifungal Immune Response in Mosquitoes. *PLoS Pathog* 11, e1004931.

Table S2. Functions of the CTLDPs with two CRDs in Lepidoptera

| Name <sup>a</sup> | Tissue <sup>b</sup> |            |            |        |                                                            | Agglutination <sup>c</sup>                             | Inducibility <sup>c</sup>   |           |                             | binding <sup>d</sup>                                                                                                    | proPO activation     | Melanization          | Reference                                                                                                   |
|-------------------|---------------------|------------|------------|--------|------------------------------------------------------------|--------------------------------------------------------|-----------------------------|-----------|-----------------------------|-------------------------------------------------------------------------------------------------------------------------|----------------------|-----------------------|-------------------------------------------------------------------------------------------------------------|
|                   | Ep                  | FB         | Hc         | Mg     | others                                                     |                                                        | Bacteria                    | fungi     | others                      |                                                                                                                         |                      |                       |                                                                                                             |
| MsIML1-4          | -                   | 1-4        | 3, 4       | 1-4    | MT (1-4); testis, ovary (1-3);                             | Ec, Sa, Sc, (1, 4);                                    | Ec, MI (1-4);               | Sc (1-4); | -                           | Mannan (2), laminarin (2-4), LPS (1-4), LTA (2-4), lipid A (2), PG (2); - (1)                                           | Yes (1, 2, 4); - (3) | Yes (2, 4); No (1, 3) | (Ling and Yu, 2006; Rao et al., 2015a; Yu et al., 2005; Yu et al., 1999; Yu et al., 2006)                   |
| BmIML1, 3-6       | -                   | 1, 3, 5, 6 | 1, 3, 5, 6 | 1      | MT (1, 5, 6); SG (1, 5); Ig, (1,6); testis, ovary (1,4-6); | MI, SI, Ca (1); Ec (rough) (1, 3); Smi (rough) (3);    | Ec (smooth) (4); MI (4, 5); | -         | -                           | Ec (rough), Sm (1, 4, 5); Ec (smooth) (4); Pv (3), MI (1,3); Sc, Ca, SI (1); LPS, lipid A (3); - (6);                   | -                    | Yes (3)               | (Koizumi et al., 1999; Koizumi et al., 1997; Rao et al., 2015b; Takase et al., 2009; Watanabe et al., 2006) |
| HaCTL1-8          | 3, 6, 7, 8          | 1, 3-8     | 1, 2, 6, 7 | 1, 3-8 | -                                                          | Ec, Sa (2,3, 7); Bt, Pa, Kn, Pp, Ca (2); - (1, 4-6, 8) | Ec (1-8); Sa (1, 4-8);      | Pp (1)    | HaNPV (1), 20E (1, 3-6, 8); | PG (1-3, 7), Maltose (3); trehalose, LPS (3, 7); mannose (1, 2, 7); galactose, sucrose (1, 2); curdlan (1); - (4-6, 8); | -                    | Yes(7); - (1-6, 8);   | (Chai et al., 2008; Tian et al., 2009; Wang et al., 2012; Wang et al., 2014)                                |
| ApCTL             | No                  | Yes        | No         | Yes    | -                                                          | Ec, Sa, Sc                                             | -                           | -         | a mixture of killed Ec, Sa, | LPS, laminarin, mannan, PG, LTA                                                                                         | Yes                  | -                     | (Xialu et al., 2013)                                                                                        |

<sup>a</sup> Ms, *Manduca sexta*; Bm, *Bombyx mori*; Ha, *Helicoverpa armigera*; Ap, *Antheraea pernyi*;

<sup>b</sup> Ep, epidermis; FB, fat body; Mg, midgut; Hc, hemocyte; SG, silk gland; MT, Malpighian tubule; Ig, integument;

<sup>c</sup> Ec, *Escherichia coli*; Ml, *Micrococcus luteus*; Sa, *Staphylococcus aureus*; Ca, *Candida albicans*; Sc, *Saccharomyces cerevisiae*; Sm, *Serratia marcescens*; Smi, Salmonella Minnesota; Sl, *Saccharomyces ludwigii*; Pv, *Proteus vulgaris*; Va, *Vibrio anguillarum*; Bt, *Bacillus thuringiensis*; Pp, *Pichia pastoris*; Pa, *Pseudomonas aeruginosa*; Kn, *Klebsiella pneumoniae*; HaNPV, *H. armigera* nuclear polyhedrosis virus; 20E, 20-hydroxyecdysone;

<sup>d</sup> LPS, lipopolysaccharide; PG, peptidoglycan; LTA, lipoteichoic acid;

Chai, L.Q., Tian, Y.Y., Yang, D.T., Wang, J.X., Zhao, X.F., 2008. Molecular cloning and characterization of a C-type lectin from the cotton bollworm, *Helicoverpa armigera*. *Dev. Comp. Immunol.* 32, 71-83.

Koizumi, N., Imai, Y., Morozumi, A., Imamura, M., Kadotani, T., Yaoi, K., Iwahana, H., Sato, R., 1999. Lipopolysaccharide-binding protein of *Bombyx mori* participates in a hemocyte-mediated defense reaction against gram-negative bacteria. *J. Insect Physiol.* 45, 853-859.

Koizumi, N., Morozumi, A., Imamura, M., Tanaka, E., Iwahana, H., Sato, R., 1997. Lipopolysaccharide-binding proteins and their involvement in the bacterial clearance from the hemolymph of the silkworm *Bombyx mori*. *Eur. J. Biochem.* 248, 217-224.

Ling, E., Yu, X.-Q., 2006. Cellular encapsulation and melanization are enhanced by immulectins, pattern recognition receptors from the tobacco hornworm *Manduca sexta*. *Dev. Comp. Immunol.* 30, 289-299.

Rao, X.-J., Cao, X., He, Y., Hu, Y., Zhang, X., Chen, Y.-R., Blissard, G., Kanost, M.R., Yu, X.-Q., Jiang, H., 2015a. Structural features, evolutionary relationships, and transcriptional regulation of C-type lectin-domain proteins in *Manduca sexta*. *Insect Biochem. Mol. Biol.* 62, 75-85.

Rao, X.-J., Shahzad, T., Liu, S., Wu, P., He, Y.-T., Sun, W.-J., Fan, X.-Y., Yang, Y.-F., Shi, Q., Yu, X.-Q., 2015b. Identification of C-type lectin-domain proteins (CTLDPs) in silkworm *Bombyx mori*. *Dev. Comp. Immunol.* 53, 328-338.

Takase, H., Watanabe, A., Yoshizawa, Y., Kitami, M., Sato, R., 2009. Identification and comparative analysis of three novel C-type lectins from the silkworm with functional implications in pathogen recognition. *Dev. Comp. Immunol.* 33, 789-800.

Tian, Y.Y., Liu, Y., Zhao, X.F., Wang, J.X., 2009. Characterization of a C-type lectin from the cotton bollworm, *Helicoverpa armigera*. *Dev. Comp. Immunol.* 33, 772-779.

Wang, J.L., Liu, X.S., Zhang, Q., Zhao, H.B., Wang, Y.F., 2012. Expression profiles of six novel C-type lectins in response to bacterial and 20E injection in the cotton bollworm (*Helicoverpa armigera*). *Dev. Comp. Immunol.* 37, 221-232.

Wang, J.L., Zhang, Q., Tang, L., Chen, L., Liu, X.S., Wang, Y.F., 2014. Involvement of a pattern recognition receptor C-type lectin 7 in enhancing cellular encapsulation and melanization

due to its carboxyl-terminal CRD domain in the cotton bollworm, *Helicoverpa armigera*. *Dev. Comp. Immunol.* 44, 21-29.

Watanabe, A., Miyazawa, S., Kitami, M., Tabunoki, H., Ueda, K., Sato, R., 2006. Characterization of a novel C-type lectin, *Bombyx mori* multibinding protein, from the *B. mori* hemolymph: mechanism of wide-range microorganism recognition and role in immunity. *J. Immunol.* 177, 4594-4604.

Xialu, W., Jinghai, Z., Ying, C., Youlei, M., Wenjun, Z., Guoyuan, D., Wei, L., Mingyi, Z., Chunfu, W., Rong, Z., 2013. A novel pattern recognition protein of the Chinese oak silkworm, *Antheraea pernyi*, is involved in the pro-PO activating system. *BMB Rep* 46, 358-363.

Yu, X.-Q., Tracy, M.E., Ling, E., Scholz, F.R., Trenczek, T., 2005. A novel C-type immulectin-3 from *Manduca sexta* is translocated from hemolymph into the cytoplasm of hemocytes. *Insect Biochem. Mol. Biol.* 35, 285-295.

Yu, X.Q., Gan, H., Kanost, M.R., 1999. Immulectin, an inducible C-type lectin from an insect, *Manduca sexta*, stimulates activation of plasma prophenol oxidase. *Insect Biochem. Mol. Biol.* 29, 585-597.

Yu, X.Q., Ling, E., Tracy, M.E., Zhu, Y., 2006. Immulectin-4 from the tobacco hornworm *Manduca sexta* binds to lipopolysaccharide and lipoteichoic acid. *Insect Mol. Biol.* 15, 119-128.

Table S3. Features of 32 *T. xiaojinensis* CTLDPs

| name   | ID                      | aa sequence <sup>a</sup>                                                                                                                                                                                                                                 | length | domain architecture <sup>b</sup> | CRD motifs <sup>c</sup> | note | GenBank accession number |
|--------|-------------------------|----------------------------------------------------------------------------------------------------------------------------------------------------------------------------------------------------------------------------------------------------------|--------|----------------------------------|-------------------------|------|--------------------------|
| CTL-S1 | comp349455_c0_seq1      | MHSYALLCAVFVAAVHAQFPNGRILEPPVPQQC VHRVVHERTSD<br>GKGYFFSWRDPALKGVEEDWLGARNFCRKR CMDLVSLETS DEN<br>EFVKSRI VQGGIKYIWTSGRICDFKGC DRPDLLPTPVNGWFWTAE<br>LQKLAPATNRQQNDWSEGGGIGRPQPDNRELLQGGAPENCVAIL<br>NNFYNDGVHWHDVACHHRKPFVCEENDALLKYVRYTNPALQV<br>*     | 218    | SP-CTLD                          | QPD                     |      | KX55011<br>4             |
| CTL-S2 | comp95219_c0_seq1_CTL16 | MQTWCLVAMTLLALAAMASGQSDRPGRFLSLPVPQKCATR PKE<br>FAYQGRSYFYSGHVPALANKKVDWLDGRNICREYCMDLISIETQ<br>EENNLVFR LIQQNDVPYIWTSGRLCDFKGCESRRDLEPKNILGWF<br>WSANREKLSATNQIPNGWGYNPWSQTGHKKQRQPDNAEFDING<br>TTESCLSVLNNVYKDGIAWHDVACYHEKPFICEDSELLNYVAA<br>NNPNLRL* | 226    | SP-CTLD                          | QPD                     |      | KX55011<br>5             |
| CTL-S3 | comp73172_c0_seq1_CTL19 | MIRHVTLVLAALMALACVASAQRR LALPDPRSCSNRVRHSTYRD<br>ARGVLHSYFFSWEHGATRSLEVDWLDARNICRRH CMDAVSLET<br>PQENEFVKQRIARGNVRFIWTSGRKC NFAGCDRADLQPPNVNG<br>WFWSGSGAKIGPTTQRNTGDWSYTG GYGQAQPDNREAAQGND<br>ESCLSILNNFYNDGIKWHDVACHHVKPFVCEDSDELLNFVRSRN<br>PGIRL*   | 220    | SP-CTLD                          | QPD                     |      | KX55011<br>6             |
| CTL-S4 | comp120472_c0_seq1_CTL6 | MNSATLLSCLVLVVVAAFAPVTGQRITTIQLDGVQYFISRMNPYS<br>PELNYFLAYQYCRSLGLQLASFETKEKADSITTYLTNAGYNKYD<br>FWTSGNNLGTDMYLWMSTGLPFNATFN YMRREAALAVDAAPA<br>SDSMDPLDMPQGSTAPQRTARHGTEHVMTNGCITLKAPSFHWEP<br>QHCAEIKDFICEQTRCYYYNYGSIPVSSAQQ*                         | 206    | SP-CTLD                          | QRT                     |      | KX55011<br>7             |

|        |                          |                                                                                                                                                                                                                                                                                                                                                                              |     |          |          |                 |          |
|--------|--------------------------|------------------------------------------------------------------------------------------------------------------------------------------------------------------------------------------------------------------------------------------------------------------------------------------------------------------------------------------------------------------------------|-----|----------|----------|-----------------|----------|
| CTL-S5 | comp184160_c0_seq1       | <p>...VVAPPPGKKEVSETDLYLLGAIEKMVYRVDFMEKRLRKVEEM<br/> LYYVMAGSNKSDSCPNNYTRAGSNCYFYGHTTEKYDWKTSNV<br/> VCKKLKGNLAEMETIEENQDVVAYIQSRSQLQGKDFWTGGLNP<br/> GLLWIWSNSARPVHTTKSNETQLVNHPLQDAPHSIHGSGRCLKL<br/> AYNPTLRSYAYYGFDCSVQRHYICELPDKGLSNDIDRLAKDIKLR<br/> ENKYIPLS*</p>                                                                                                    | 224 | ?-CTLD   | HPL      | lost N-terminus | KX550118 |
| CTL-S6 | comp285015_c0_seq1_CTL26 | <p>MLLCYAGEARSAGHQSPGLGAIGKADCASCDDDDSTLGVNRWTMP<br/> LLKLGEKRYLGIFFKANWFRAAQYCRFHGMHLASISSQEENDK<br/> LEKYVRDSGFGNEHFWTSGTDLADEGSFFWMSSGRPLTFVNW<br/> AGEPNNFRYDNGEEENCLELWNRDGKGLKWNDSPCSFETYFVC<br/> EVRTD*</p>                                                                                                                                                           | 178 | CTLD     | EPN      |                 | KX550119 |
| IML1   | isotig04615_CTL1         | <p>MLYFLLFLVVVAAGKSIETSKQVFKFYRNDYDFTPEFDCLYKFH<br/> TLDRTWADARAQCQAEGAELAAPDTANEAEYLHSLLSKRAPDV<br/> SGIFLGIHSQFAKGYFVSLRGVPLENIYHEWQHGEPPNYDNLEAC<br/> VAMTRDGKLNVDKCDKEYPYICKLASTLKIENDKCKTYDIAYE<br/> PTEKGDRCYKFHTEPKTWKEAYMICKSEGSYLA VMNSEESNHL<br/> VKKFDKVSRLNDLYGLTDKHRFIIGFHDMLHEGEYRTIFGQSLKD<br/> AGFVNWCQGQPDNYNGKQNCGAILHDGTLDDIECDTPYTFVCE<br/> REIKKES*</p> | 314 | SP-2CTLD | EPN, QPD |                 | KX550120 |
| IML2   | isotig04304_CTL2         | <p>MFKLIFLFIGAATCSSIGLPSLSFRDDYSYAESQKAFYKFHRVPRT<br/> WEVARFLCGAEGGQLASPEDEELKFFHGMLAGMPNSVFGLYIG<br/> AHRKFPSTFVNLNGKRIDSVLRWWDHLEPNENDYTEDCVTVG<br/> RNGKLNDCRDKRFPFVCKVASESVVANTVCKNFDPAYQPYDKI<br/> PSRCYKLHTEPKTWHNAYQTCTSEQSNLVVVKSADEADYLSKLI<br/> KQNLPSKVIKSAKDKIVVGFHDLFAEGEFRTVFGKLDNIGFSS<br/> WAEGKPDEHQDGNDCGALNSEGKLEDVSCNKQFAFVVCVREV*</p>                  | 307 | SP-2CTLD | EPN, KPD |                 | KX550121 |

|      |                      |                                                                                                                                                                                                                                                                                                                                                                                                         |     |          |          |              |
|------|----------------------|---------------------------------------------------------------------------------------------------------------------------------------------------------------------------------------------------------------------------------------------------------------------------------------------------------------------------------------------------------------------------------------------------------|-----|----------|----------|--------------|
| IML3 | isotig03303_CTL<br>3 | <p><a href="#">MSTYHIMVFICFTCQLFLCPVDS</a>VIGIATFFRRDYDLIHSQRSFYK<br/> VHNIPKSWNDARKQCILEGSTLAIPETAEEAEKLRDLMSKKIDTN<br/> SVAYLGIQAFTKGFFFTLDGRSINEIYHGWAPGQPNVDVNQEDC<br/> VILSSDGKLNVDNVCVKNPFICEKSQDSATWNNACETSDLAYTR<br/> VAGMAHCYKVHLEPKNWPDAYATCVAEQSYLAILNSRTEKAL<br/> INLFNTKPYRNVTQNFLRGAIHLGFHDRFTEGLFTTIRGDTLSDAG<br/> FDKWGGGQPDHSLVETCGSMFYDGELNDIGCEQRCFFICEREVG<br/> DGSSALSLRFAGLE*</p> | 316 | SP-2CTLD | QPN, QPD | KX55012<br>2 |
| IML4 | isotig01895_CTL<br>4 | <p><a href="#">MLKVSLLLILIYFNLICISGVNG</a>DTSQFFRREYTLYSEVEAFYKVQ<br/> KTPKSWNDARKACILEGSTLAVPETAAEAEVYSKLIDDNLDDYR<br/> RLVFGIHAFAARGLFITLDDTPIDEIYHGWAPGEPNDMDDNEYC<br/> VAIDRRGKLRDVPCLNKYPFICEKARDTVKWNDCQIADLDYGR<br/> INGMANCYKLHLTPKNWTEAYATCTGESSLAILNSEAESTALK<br/> QLYETKSDAKINSGNVDILLGFHDKFREGQFITIKGMSLVEAGFN<br/> SWSSGQPDHPTTETCGSMFPSGLLNDVNCALPSPFICEHENDLAI<br/> MPRRRI*</p>          | 318 | SP-2CTLD | EPN, QPD | KX55012<br>3 |
| IML5 | isotig01063_CTL<br>5 | <p><a href="#">MFRFLPVLLYCLGINS</a>AKMTNPFFRSYTYEPSQESFYKIHFKETS<br/> WLEARALCEAGTSLVMPEKPEIEYLKIMNDNLPENVIAAYIG<br/> IHDMFSEGIFVTLTGRDVPIAHNYWAPGEPNNSNTEHCVHILRS<br/> GKYNDIVCSNRYPFICKKTLESLTANPRCATSDLAYFPNYNTSSC<br/> YKLHLTPKTWTDAFATCHAEQSYLAIVNSADEAQFFKEQLADHP<br/> PASLHGDFFKDGIYLGFDLDFSEGSHVTILGTPLSQTGFAQWSPG<br/> QPDNAGQNENCGHMYRSGLLNDINCSSYKLIFFCERDI*</p>                             | 308 | SP-2CTLD | EPT, QPD | KX55012<br>4 |



|      |                         |                                                                                                                                                                                                                                                                                                                                                                                                                                                                                                    |     |          |          |              |
|------|-------------------------|----------------------------------------------------------------------------------------------------------------------------------------------------------------------------------------------------------------------------------------------------------------------------------------------------------------------------------------------------------------------------------------------------------------------------------------------------------------------------------------------------|-----|----------|----------|--------------|
| IML6 | comp112889_c0_seq1_CTL7 | <p> <a href="#">MIIQLSLIICVLVEFGYVLA</a>GENRIFRYDYEFSDIINSYFRLHKYPR<br/>           SWVNARTRCRHEGAQLYTPANGQEADFKLLHEDLHSDFNIGY<br/>           LGLNAYFSEGDFASTEEQSVLDLYNVWWDGEPNNMNDIEDCAV<br/>           MTRTGKYSVDVACNQVFPFLCARPEAGLTWNSACNTYDMGYQSS<br/>           PGLSSCFKIHTDPKNWTNGYATCKAEGGYLAIVNSVAEKSFLVK<br/>           MFAENPAGSLRGNFWKDVLLIGFHDWFMAREYEYLDGPRVPLT<br/>           KFSGGEPNDFAPGERCGAMYRNGLFDDIWCNRPNIFACERPLVA<br/>           ALPPGRGVTPPTWRSSRNR*         </p>           | 325 | SP-2CTLD | EPN, EPN | KX55012<br>5 |
| IML7 | isotig04171_CTL8        | <p> <a href="#">MMKKSIFLLKILLIVPPFAIA</a>EKTQWQYMGSQFREDYQLQPDLK<br/>           AFYKIHRTPLTWFDARTRCDREGAELVAPQSHEEVEMLKTLLK<br/>           LDMHEPFLFLGIHSLFAKGRFVTLSDVDVQNLNLHWESGEPNNY<br/>           KNNENCVTLNNGRLSDTDCNDVHPFVCKKVARNISWNNECYT<br/>           YDQEYKLDSSLSTCYKLHTQPKNWTSAYDVCSEGGHLAIINSV<br/>           EEKNFLVKLLGEHPPARIQGNFNKDMTFLGFHDLFVSREFRTITG<br/>           ETLQEAGYNEFAGNQPDNVSPGEHCGAMFRNGQLDDLWCDRPY<br/>           LFICERSNELRERPQDPFMKHFSKELVYIVPA*         </p> | 339 | SP-2CTLD | EPN, QPD | KX55012<br>6 |
| IML8 | isotig03362_CTL9        | <p> <a href="#">MLITYIFLIQLLAGTLYA</a>ATAGTKQWQYTGSQFREYYEFKSSLKA<br/>           FYKVHRVPLTWH DARTRCDREGAELVAPETYEEVDMLKSVLEK<br/>           VNAHNPSLFLGIHSLFMKGNFVTLSDVNLEDLSLWTFEGEPNNIA<br/>           NNENCITMNQMGRLADTDCNSVHPFVCKRKAKNMSWNNECNT<br/>           HDAAAYTLAPSLSTCYKLHTQPKNWTTGYDVCKAEGGYLAIINSI<br/>           EERDFLAKLLEKHPPESILGNFGKDIYIGFHDLFVNREYRTLEGQ<br/>           TLAEAGYNQFAGNQPDAPPGERCGSIFRNAQLNDAWCDRLFLF<br/>           ICERSIKKRGKAESLSAQ*         </p>          | 327 | SP-2CTLD | EPN, QPD | KX55012<br>7 |

|       |                              |                                                                                                                                                                                                                                                                                                                                                                                                           |     |          |          |              |
|-------|------------------------------|-----------------------------------------------------------------------------------------------------------------------------------------------------------------------------------------------------------------------------------------------------------------------------------------------------------------------------------------------------------------------------------------------------------|-----|----------|----------|--------------|
| IML9  | comp119095_c0_<br>seq1_CTL10 | <p><b>MWFLNIFLIVAVAGGTIEVSPNEFLELYPDEYTYASTLDCLYKVH</b><br/> ALPRTWDEARFQCQAEGAELAVPVNVEEAEYLHNLLCKLETPSQ<br/> GIYTGLHSLFAKGYFVSPTGVPVENLFNKWDCGEPDDSNEQDC<br/> VILGMSGKLDKSCNRRYPYVCKLSSSLKTNNARCQTYDLAY<br/> QPVESGDRCYKFHLEPKNWKEAYAICRAEGAHLVVLNSEDEM<br/> R YLTKKFDKLRNDLYGPTDKHRFLIGFNDLLHEGEFRTIFGQTLQ<br/> AAGYESWCSSGQPDDRNRRTQNCGAILHDGTLDDVECDKQYVFAC<br/> EKETNLL*</p>                        | 314 | SP-2CTLD | EPD, QPD | KX55012<br>8 |
| IML10 | isotig04092_CTL<br>11        | <p><b>MFRAFLMISCCLIAATDA</b>AATSKDDPYFRSDYKYESSLAIFYKV<br/> HKSAYWTDARAACQYEGASLVVPETQAEINVLVQLINEQLKN<br/> DTTGIFVGIHDLFIEGTFMTINGEEIDDIFENWAAGEPNDVNDNED<br/> CVLLHRNSKYDINCKSKFPFICKKTLATLTANPMCETADKAYFP<br/> DAAGDKCYKHLHLEPKTWSEAFTHAEQSYLAIINNDVEAKLLK<br/> ETLAKHPKDTLKGNYKDGAYLGFHDQFTEGEFVTVFGQRLAET<br/> GYVEWSPGQPDNANKNENCGSIFRSGLLNDINCAKLLYFCERD<br/> TGDANAVGLFSRFQENSPTVQ*</p>           | 331 | SP-2CTLD | EPN, QPD | KX55012<br>9 |
| IML11 | comp123926_c0_<br>seq2_CTL12 | <p><b>MLSALFVIPCCLIATTNVVVA</b>QDTPNFRSDYKYOPTMAAFYKV<br/> HKSPKYWTEAVSTCKYEGGYLVVPESQGEIDFLVKLIENQLSGD<br/> TTGVFVGIHDMFIEGNFMTVKADSISDIFDNWAAGEPDDFQDNE<br/> DCVLLHRNSKYDYDCKRKFICKKTLASLTANPLCGTSDKAYI<br/> PDVTGDKCYKHLNPKTWSEAYTICHAEQSYLAVPTNKKESDLL<br/> KEMLAHPENTLNGNFYKNGAYLGFHDQFTEGEYVTVFGPEPLS<br/> QVSVVEWSPGQPDNGLNNDENCGHMFDRDGLLNDVNCSSWKL<br/> MF FCERQIGDDDDVIDLFSRVQNNIPELRSLEGS*</p> | 337 | SP-2CTLD | EPD, QPD | KX55013<br>0 |
| IML12 | comp118822_c0_<br>seq1_CTL13 | <p><b>MMFRILLILSCYLIAAIT</b>MNQESEPTFRPDYKYVDSEAAFYRLNIN<br/> PMNWTEARSTCQEEGASLVVPENQSEIDILVELIKSKSLDNARGV<br/> FMGIHDMFLTGTFLSINGQEMSEVFENWASDQPNRKAGKANCVF<br/> LHRNSKYDYGKCKSKLPFICKKTLDTLTEQPLCETSDVAYFPDAT<br/> ETRCYKHLHLPKTSKAFATCRAEQGYLAIINDEEEANILKNKL<br/> AEHPKRTLKGFNDKDHVFLGFHDRFTAGEFITVFGTSLSETGFTQ<br/> WAPRRRNRKNRQHCGGLMRNGFLDDINCSSKCMFFCERELGD<br/> ANTVDIFSRFQDIEPETS*</p>         | 329 | SP-2CTLD | QPN, RRN | KX55013<br>1 |

|       |                       |                                                                                                                                                                                                                                                                                                                                                                                   |     |          |          |                 |              |
|-------|-----------------------|-----------------------------------------------------------------------------------------------------------------------------------------------------------------------------------------------------------------------------------------------------------------------------------------------------------------------------------------------------------------------------------|-----|----------|----------|-----------------|--------------|
| IML13 | isotig04145_CTL<br>14 | ...NVTRNIFSIQKGEPFFRSYVPSQAIFYKIHKTEKIWSEALAL<br>CQYEGAALVVPESKSEIDTLRKIIDHNLTNASIAVYTGISDVLVEG<br>TFATTSGFDISEIFENWASDRPTTPPTSDTSDCVVMRRNMKYSDV<br>VCSRKFPFICKKTLSTLTFNLICQTADINYFPDAAGNRCYKLHLKP<br>KIWPDAYAVCRAEQGYLAIVNDAAEVKLLKDKFAEYPNNTIKG<br>NFNKDQVYMGFHDRFIEGEYITVLGRPLSETGYEEWSPGQPDNA<br>KYSEDCGTMFRSGLYNDVNCWVKLMFFCEREVDSEVGIFVRF<br>QEDTPVIQ*                      | 320 | ?-2CTLD  | RPT, QPD | lost N-terminus | KX55013<br>2 |
| IML14 | isotig01955           | <a href="#">MFRVLPILLYFIGINSA</a> KPTNPFRTDYTYQPSQESFYKIHVTKS<br>WSEARVVCEAEGTFLVMPESIPEIYLVKLMDENLPENVIAAYIGI<br>HDMFAEGIFVTLTGRNVPTTHNYWSPGEPTNANNKEHCVHILRS<br>GKYNDIDCSNRYPFICKKTLHSLTANPRCATSDVAYFPNDNTSSC<br>YKLHLEPKTWSDAFVTCQAEQSYLAIINSAGEAQFFKEKLADHPP<br>ASLNGTQNHGLGVYLGFDHMFTEGSYITIQTTLTSLQAGFAQWSPG<br>QPDDVGYRQONCGHMFRSGLLDDINCFYKLIFFCERDIENTGHFI<br>SFRNLVSTS* | 324 | SP-2CTLD | EPT, QPD |                 | KX55013<br>3 |
| IML15 | isotig05113_CTL<br>17 | <a href="#">MRKYRLLLISAYLICRYRVNG</a> NTTGFFRTDYTLHSEVGTIFYKAH<br>KNPKSWNEARKWCMLEGATLAVPKTGIEADYKTIMDDKLDFAF<br>VHSVYVGIQAFSKGLFTSLDGTPIIDNLYHNWRPNPNLGNED<br>CLVIDRLTNGLNDVPCDHSYPFICEKSQDSVKWNNDQCQIADPDY<br>RRLDGMQHICYKLHKKKNWADSYATCTAEQSYLAILNSEEESN<br>ALKQLVASESGGNVQRYEIFHLGFHDYAEGEFKTIQGMTLHEA<br>GFETWSDPYQPDHPGLENCGSMYGNGKLNITCSIPLLFICELE<br>NNSALSTRMSG*         | 318 | SP-2CTLD | EPN, QPD |                 | KX55013<br>4 |
| IML16 | comp98872_c0_s<br>eq1 | ...EQSALDLYDEWNDGEPNNQNDNEDCAVMTRTGKYSVDACDQ<br>VFPFLCVRSKVGLTWNACNTYDQSSAGLSSCYKIHTNPKN<br>WTDAYGTCKAEGGYLAIVKTADEKTFLIKLFADHPSSSLRGEFW<br>KDALLIGFHDLFVSREYIYIDGPLVPLIKFSGAEPDNYTPGERCGT<br>MYRDGLFDDIWCDRPNIFACEMPAVARTAKNVTPLRFRKQ*                                                                                                                                           | 215 | ?-2CTLD  | EPN, EPD | lost N-terminus | KX55013<br>5 |

|       |                         |                                                                                                                                                                                                                                                                                                                                                                                       |     |            |          |                 |              |
|-------|-------------------------|---------------------------------------------------------------------------------------------------------------------------------------------------------------------------------------------------------------------------------------------------------------------------------------------------------------------------------------------------------------------------------------|-----|------------|----------|-----------------|--------------|
| IML17 | isotig01874_CTL20       | <p>METFSIFTILVCLLSYFRSTSCAAATFFRRDYDFFCQDQGAFYKVHT<br/> VPKTWNDARKQCILEGSALAVPNDGAEAEVFRKIMEVKLGAKA<br/> VAFLGIQAFSKGIFTTLDGIFIDDIYHNWAPGEPNDAGGTEDCIIM<br/> DQLGKLNDECERKYAFICEKSQDSVMWNDACETSDLEYTRVD<br/> NMEHCYKVHLEPKNWTDAYAICVHEQSYLAILNSREESKALIKL<br/> FQTKPHRDVVRGNFLSGAIHLGFHDFKDGVFVTTIQGQPLAEAGFE<br/> KWGGGQPDGPGGETCGSMFYDGELNDVGCNVRCFFICEREAGD<br/> GGSALSVRFG...</p> | 320 | SP-2CTLD-? | EPN, QPD | lost C-terminus | KX55013<br>6 |
| IML18 | comp148184_c0_seq1      | <p>...RCYKINTEAKTWKEAYQICTAEGSYLAVLNSEKEMKYLTRKFS<br/> DIYNDKIYGNFFKNVMLIGFHDLLEHEGEYRTIFGEKLEEAGFENW<br/> CHGQPDNDKNDQHCGGMLRDGTLDDVSCDKQFIFACEREIKSPV<br/> KSINSTTQ*</p>                                                                                                                                                                                                            | 140 | ?-CTLD     | QPD      | lost N-terminus | KX55013<br>7 |
| IML19 | comp81800_c0_seq1_CTL23 | <p>MSSFKSVCFLLFMCVLVTISGSYIERLKLDPHPPHNKGYDYTKTL<br/> NAFYKVHDLPQTWNTARAICEADGAALMWFHNKDEAVEMLVN<br/> YPKHYKQIFLGIHNSKFSKRVFVTVKGLQIEDVYNNWAIGQPDNV<br/> EDDVDCVVISPEGLTAVVDCNMRLPFMCRRDYDGIINYLNNDN<br/> TYDKGYIYKEQMKRCYKVHTEPKNWTDAYAICFAEGSYLAVIN<br/> SLEESKILVKLINHVHVYGNVWFDKTQYLLGFHDMFAEGEYRTI<br/> FGETLKEAGFDQFASGQPNNVDEQNCGGMTTEGNLNDLWCTKP<br/> FPFICARDVSLKPW...</p>   | 319 | SP-2CTLD-? | QPD, QPN | lost C-terminus | KX55013<br>8 |
| IML20 | comp99460_c0_seq4_CTL24 | <p>...SAAATFFRRDYEFYKNQRAFYKVHAIKCLNQARIQCNEAST<br/> LAVPKTAAEAEIFKDLMKKTINPNSVAYLGILALSKGIFTTFDGIPI<br/> DDMYHEWAPGQPDDANDEYCVVMGSDGKLSDINCFYKNPFICE<br/> KSQDSVTWNYACETSDLAYTRVPEMDKCYKVHLEPKNWAEAY<br/> ATCAAQSYLAILNSKEESTSLINLFNTTPHRYVSGNYAIGAIHLG<br/> YYDGFAQGVRTLQGGQTLTNAFGDKWAYMQPDHPRSEYCGSM<br/> FYNGELNDIGCEYRCFFICEREAGDGSSALSIRNANVY*</p>                             | 310 | ?-2CTLD    | QPD, QPD | lost N-terminus | KX55013<br>9 |

|       |                    |                                                                                                                                                                                                                                                                                                                                                                                                                                                                  |     |           |          |                 |              |
|-------|--------------------|------------------------------------------------------------------------------------------------------------------------------------------------------------------------------------------------------------------------------------------------------------------------------------------------------------------------------------------------------------------------------------------------------------------------------------------------------------------|-----|-----------|----------|-----------------|--------------|
| IML21 | comp102009_c0_seq2 | <p>MYKYRLLLVLAYLIWQYRVNGSTTVFFRRDYTLHSKVGIFYKAH<br/>           KNPKSWNEARKICILEGATLAVPKTAIEAEVYKQIMDDKLDSEV<br/>           HSVYVGIQAFSKGLFTSLDGTPIENIYHNWRPNPNLDLNNEDCV<br/>           IIDRLTGLNDVACYHRHPFICEKSQDSVKWNNDCQIADPDYRRL<br/>           DGMQHCYKL...</p>                                                                                                                                                                                              | 186 | SP-CTLD-? | EPN      | lost C-terminus | KX55014<br>0 |
| IML22 | isotig03477        | <p>MFRVALILLPSWYIISINASAIQKADPYFRSDYDYVASQAIFYKIH<br/>           KTPRTWTDALALCQYEGAMLIVPESKDEIYILKEIIDNTLTNASIA<br/>           VYTGINDIIMEGIFLTITGIDISDIFENWAPDRPNDDGAQSDCVAM<br/>           RRNMEYSDVACGRKFPFVCKKTLATLTVNEICQTFDKNYFPDAT<br/>           ASRCYKLHLAAKNWSQAYKVCRAEQAYLAILNSAGEANFLKDK<br/>           LTVYPKDSLKGNFGREEVFMGFHDKFVEGEFMTVFGQPLAETGF<br/>           EEWSSGQPDDARSNEDCGTLSRSGLLNDIDCFAKRMFFCERELE<br/>           DSATTARVI*</p>       | 322 | SP-2CTLD  | RPN, QPD |                 | KX55014<br>1 |
| IML23 | isotig04483_CTL30  | <p>MFRFLPIVLYCLGINSKVIIPFFRSYAYEPSQESFYKMHLVTKS<br/>           WTEARAVCEAEGTSLVMPESKSEIEYLVKLMDENFPKHMIAAHI<br/>           GIHDIFAEGIYVTLAGHYVSTTGDIWSPDEPNFNNKEDCVHIRR<br/>           SGKYNDIDCSSIYPFICKKTLDSL TENPRCATSDLAYFPGDNTGSC<br/>           YKLHLTPETWSDAFATCYAEQSYLAIINSADEAQLFKQKMADYP<br/>           PDSLHGEFFKDG IYLG FHD MFSEGRHV TIQGTLLSQTGFAQWSPG<br/>           QPDNNS ENENCGHMYRSGLLNDINC SCKLIFFCERDIENSERNNIS<br/>           IKNLVTSN*</p> | 324 | SP-2CTLD  | EPN, QPD |                 | KX55014<br>2 |

...GTNVAFRKPANQSTTVRGGGAANGNDGKETTTEHDGKRCTETQ  
REASPWVQVDLLRHYAVKVVRVTTRGCCGHQPLQDLEIRVGNS  
STDLQRNPLCAWFPGTIDEGVTKTFTCARPLIGQHVFLQLVGVEG  
SLSLCEVEIFTTEEFNSNDRCAPPSAPADIQLAAFSRTCYEFNVAKG  
GSFEEARKYCYQHGGDLIHGFQGATSSFLLQELERRKAQLKTQL  
VWVGAEKEPGLTSRTWRWVNGETVSRPAWGKDQPNNYNGEQN  
CAVLDGGRSWLWNDVGCNLDYLHWICQHLPAACGSPDKLLNT  
TIIGHNYTVGSEITYKCPVGHMLIGAAARTCGKDGFWTATAPSC  
KYVDCEGLSPMADGLVTLIDNRTTHGAVALYTCHENYTLIGKSE  
RVCSDDGTWSESVPQCLFDWCPDPPNVVGSTVEVDGHKAGSLA  
TYTCHPGFILFGQQTVTCTLGWTGTTPPSCKYIDCGTPAQIDRG  
SFNLLNGSTTYGSYAQYSCEADHWLDGAEYLACNRD GKWSHDT  
PACELITCDEPEVPPGGYVVG YDLNVHSSIEYHCEVGHKLVGEST  
LTCQQDGEWSREAPLCEYVDCGKLP SMLYGS AEYINGTTHLASL  
IHYSCTTNYRLVGPVTRICQDNHQWSDTSPKCEEIRCPEPIVADNS  
IVSVTGNDRMYGRTLIRTADSYSSNAMTYKIGALVKYRCERGYK  
VIGESLSTCEDTGAWSGNTPKCQYVDCGNPGRIANGKVTLATNA  
TYYGAAALYEC DKNWQLDGVSRRLCQDNGTWSSEAPVCKEITC  
NDPSTFQRELS PGLHVITSTRSIGGVAHYRCDRGYTLQGNTRTC  
QPRGSWNGQQPICLPVDCRDPGIIENGR IIIITNGTTLFASTIEYHCL  
PHYQRIGPFLRKC MEDGHS GEEPSCELISNETQDSSNLPLSVGIG  
CGVVLFLMLLGHYMLRKRKATPVKNTENVEGAERKEDQNAAV  
MSYSTLHDGNNGIRGNHIYDHVNDNVYDSPYSDHLTDNHTYNR  
SQGDDSDTTYEPEPQNGPSAVVTINGVAVR\*

CTL-X2 comp99293\_c0\_s  
eq4\_CTL25

1043

?-FTP-CTLD-  
10CCP-TM

QPN

lost N-  
terminus

KX55014  
3

MKSVLSILFLTVCLSNSQVYQQVPEGTDPYGQNPTYGQAPTYGQ  
GSSYPNYQQPNLQSNYLNQSNLGYNNYGANYPQQNEYQNNYN  
QQDPFNQSGNYRADDFINPSSPNDVDSSSYGNRDLDFSRPQCPQ  
NWILFQASCYRFMKSPLRPRNEARKICQAYESDLISINSVEEHGFII  
NELLKLDQPQRKQWYISARQQSPQYWTNDGDGTQMSNMENAFLT  
DNHMOVYQQDQIGRDYLVYKFSDISRKWGFEQVDGYEPLLFICEA  
PVNKLKVLVDDDRSFTYGLNIDDPNKIPRGPYFIRQPEDKTFDLS  
KRTIMNEVQLKCLAGGYAPPTYAWYKEEYEFDKLVPKKIDPLSD  
SRYTVSGGTLIIYNPENIIDGSNYHCVA TNKYGSIKSESVLLSFGYI  
REFNLKRSSEQGNQYWGKVLCDPPPFYPSVNYWYSRDYFPNF  
VEEDERVFVSNDDGLYFTALEPIDRGIYSCNVKSRVSDTGRNGPF  
FNLYVYPHADFQQLKFPNFPKAFPDAPVVSHEVRLECMAFGY  
VPSYNWTRTGGRIPRHAQMSSFGRILTIPSVSIEDEGEYVCTITND  
RASINNSVVLKIQAYPNFTIPLTDKHMDNKGDLTWTCEAFGVPD  
VNYTWWKNGERLTMDTIAPEDRDRYHIQDNILTIKYLDPTKDPG  
MYQCAARNQLKTTYSSAQLRVLSLKPSFKKRPLESETYGAEGGN  
VTIACNPEAAPKPTFTWKKDNNVIGGGGKRRILENGLVISPVSR  
DDEGVYMC AAKNQYGNDESLGRLIVLRAPRFIEPLPTRINTLFGQ  
SLFLHCNAETDEILD TAFIWNHNGMRIKEVGDYFADKRL...

CTL-X4

comp98113\_c0\_s  
eq1

840

SP-CTLD-5Ig-?

DNH

lost C-  
terminus

KX55014  
4

...SEESSFTPLKDLNLPYNLFMSMIDICDTSKVVTVEERVLVYYKYD  
 NNPVNCVKIFRSVFRVKPFGFRLQLFHLFNHTRTYGKRDALSLYD  
 GDIFNVTAPMIGYLEHGSPDEKFLFRTEGARLSVKLFANGAPSFH  
 GFIAEVVTLPIAIGFNRDVQHNISNSEFIENRQGAISYHSVGEVNP  
 VLTMDRNQFMRNCKQLYGNFTTCQSALRVDVQNTQTLYFRNNL  
 VSENQGGLYLRADSRGSATSLKGWLHNNLFTANLNLPCRIEGR  
 QSSPYQEVTIYRNYFTRNWTPEKDVIVLRQVVSNFTHNYVHYNT  
 GLRILQVSGFDKVRLLPIYQTTSHNGFYSNHALDRDGRATVVAGT  
 AGQHYVDNIFFNPDNDYEMITVNRSVQLDLWRTRIDAAHNYWS  
 YNESYAVGGIRDKSDNPLLEVEYRPYYMNNASVLNGKCPPG  
 WDLVGGTCYMYVGAPMNYEDARRFCLSDNASMPYISGTSYFEL  
 YRFLQRQNQWFQFNDRVWVQHIDFVTQCTSFSFQTIQVDDCQRK  
 SAFLCEIDPKIFIDPMFWRDDAVIVGVVGVLAGTILLVAAAIACW  
 YSKSRHRHAQRLERRNSIRQSLHSVRSIGSMNGGFADISYRRKMG  
 QLSTRSTDTLTKNSDYKMLASSASVDSVEKSQFNSSLEDNQSY  
 DIYEAHNPNNIPLKHSSFNKRTSPPEYSAPINRASYDLAFRNEG  
 FRDISTNPSVGSANTVLTTEEPIIHHHPGGIASTSQESAYGDDDTLS  
 PNSDNQYYNADTLPLRGNTMGSSDTLDFKRGLEKETNGYNQY  
 GAPVMYGKQPKLSFLKELRHRSLNADQPPPNVAMPQTTFGQRR  
 NNIVDQQQYFDDNLPSPHPPGYESYDTSPDQHLPGYDSTPSQNY  
 SNDFSHSHGMPKSRSEALLETSFDFDSDSDSTAGPLPMTEAHR  
 SMSQPLETAM\*

CTL-X6 comp77692\_c0\_s  
 eq1

942 ?-CUB-2PbH1-  
 CTLD-TM ? lost N-terminus KX55014  
 5

a : aa sequence means amino acid sequence. The signal peptide in each sequence is shaded in blue.

b: The missing parts in the CTLDPs are indicated by "?".

c : The Glu-Pro-Asn (EPN) and Gln-Pro-Asp (QPD) motifs are highlighted in blue and orange, respectively. The CRD motif in CTL-X6 could not be identified and used "?" to denote



Table S4. Primers for 6 genes encoding CTLDPs

| Oligonucleotide Name | Sequence                |
|----------------------|-------------------------|
| IML1-F               | TTCGTGAACTGGTGTCAAGG    |
| IML1-R               | TGTCGCACTCAATGTCATCC    |
| IML2-F               | AGCGTTTCCCGTTCATAT      |
| IML2-R               | TAAGCATTGTGCCAGGTC      |
| IML8-F               | CTGTGCTGGAGAAGGTCAATG   |
| IML8-R               | GTTTCGCAATGTTGTTTCGGTTC |
| IML10-F              | CAGCAGGCGACAAGTGTTAT    |
| IML10-R              | TGATAGCGAGGTACGACTGTT   |
| IML11-F              | TGGCTAAGCACCCCTGAAA     |
| IML11-R              | CAACACTGACCTGCGAAA      |
| IML17-F              | GTGATGTGGAATGATGCTTGTG  |
| IML17-R              | CTAGATGGATTGCTCCGCTTAG  |
| rpS3q-F              | GAGAATTGGCTGAAGATGGT    |
| rpS3q-R              | GAGGTCAACTCCCTGATACG    |

Table S5. Structural characteristics of 53 CTLDs in *T. xiaojinensis*

| Domain | Motif | Sugar <sup>a</sup> | Binding site residues                            | C-score <sup>b</sup> | Ca <sup>2+</sup> | Binding site residues                               | C-score <sup>b</sup> |
|--------|-------|--------------------|--------------------------------------------------|----------------------|------------------|-----------------------------------------------------|----------------------|
| CTL-S1 | QPD   | FUC                | 125,127,129, <b>138</b> ,155,156,157             | 0.59                 | 2                | [76,80,128, <b>138</b> ,139] [48,50,54,168]         | 0.15; 0.12           |
| CTL-S2 | QPD   | MAN                | 129,131,133, <b>142</b> ,159,160,161             | 0.64                 | 2                | [47,49,53,172] [75,79,132, <b>142</b> ,143]         | 0.09; 0.07           |
| CTL-S3 | QPD   | TRE                | 73,129,131,133, <b>141</b> ,147,158,159,164      | 0.63                 | 2                | [52,54,58,171] [80,84,132, <b>141</b> ,142]         | 0.11; 0.09           |
| CTL-S4 | -     | TRE                | 63,94,96,98,135,141,148,149,154                  | 0.30                 | 0                | -                                                   | -                    |
| CTL-S5 | APH   | MAN                | 102,104,106, <b>110</b> ,127,128                 | 0.36                 | 2                | [39,41,45,140] [70,72,105, <b>110</b> ,111]         | 0.20; 0.14           |
| CTL-S6 | EPN   | NGA                | 76,108,110,112, <b>120</b> ,124,126,136,137      | 0.82                 | 2                | [83,97,111, <b>120</b> ,121] [53,55,59,149]         | 0.25; 0.13           |
| IML1A  | EPN   | MAN                | 97, <b>99</b> , <b>105</b> ,117,118,120          | 0.91                 | 2                | [71,75, <b>99</b> , <b>105</b> ,106] [41,43,47,130] | 0.16; 0.15           |
| IML2A  | EPN   | MAN                | 97, <b>99</b> , <b>105</b> ,117,118,120          | 0.91                 | 2                | [71,75, <b>99</b> , <b>105</b> ,106] [41,43,47,130] | 0.16; 0.15           |
| IML3A  | QPN   | NGA                | 63,96,98,100, <b>104</b> ,108,110,116,117        | 0.90                 | 1                | [70,74,77,99, <b>104</b> ,105]                      | 0.20                 |
| IML4A  | EPN   | TRE                | 65,97,99,101,105,111,117,118,123                 | 0.72                 | 1                | [41,43,47,130]                                      | 0.14                 |
| IML5A  | EPT   | TRE                | 65,98,100,102, <b>106</b> ,112,118,119,124       | 0.86                 | 2                | [72,76,101, <b>106</b> ,107] [41,43,47,131]         | 0.40; 0.12           |
| IML6A  | EPN   | GQ2                | 64,97,99,101,109,117,118,119,125                 | 0.85                 | 2                | [71,75,100,105,106] [41,43,47,130]                  | 0.30; 0.08           |
| IML7A  | EPN   | MAN                | 63,97,99, <b>105</b> ,117,118,120                | 0.86                 | 2                | [71,75,100, <b>105</b> ,106] [41,43,47,130]         | 0.25; 0.12           |
| IML8A  | EPN   | NGA                | 64,97,99,101, <b>105</b> ,109,111,117,118        | 0.86                 | 2                | [71,75,100, <b>105</b> ,106] [41,43,47,130]         | 0.22; 0.13           |
| IML9A  | EPD   | MMA                | 97,99,101, <b>105</b> ,117,118,119               | 0.74                 | 2                | [71,75,100, <b>105</b> ,106] [41,43,47,130]         | 0.19; 0.11           |
| IML10A | EPN   | TRE                | 65,98,100,102, <b>106</b> ,112,118,119,124       | 0.82                 | 2                | [72,76,101, <b>106</b> ,107] [41,43,47,131]         | 0.52; 0.12           |
| IML11A | EPD   | TRE                | 65,98,100,102, <b>106</b> ,112,118,119,124       | 0.79                 | 2                | [72,76,101, <b>106</b> ,107] [41,43,47,131]         | 0.52; 0.13           |
| IML12A | QPN   | GQ2                | 65,98,100,101,110,118,119,120,126                | 0.79                 | 1                | [41,43,47,131]                                      | 0.14                 |
| IML13A | RPT   | NGA                | 98,100,102, <b>108</b> ,120,121,122              | 0.68                 | 2                | [72,76,101, <b>108</b> ,109] [41,43,47,133]         | 0.45; 0.14           |
| IML14A | EPT   | TRE                | 65,98,100,102, <b>106</b> ,112,118,119,124       | 0.86                 | 2                | [72,76,101, <b>106</b> ,107] [41,43,47,131]         | 0.38; 0.12           |
| IML15A | EPN   | MAN                | 97,99, <b>105</b> ,118,119,121                   | 0.91                 | 2                | [71,75,100, <b>105</b> ,106] [41,43,47,131]         | 0.20; 0.14           |
| IML16A | EPN   | FUC                | 15,17,19, <b>23</b> ,35,36,37                    | 0.98                 | 1                | [18,21,22, <b>23</b> ,24]                           | 0.13                 |
| IML17A | EPN   | MAN                | 96,98, <b>104</b> ,116,117,119                   | 0.90                 | 2                | [70,74,99, <b>104</b> ,105] [41,43,47,129]          | 0.15; 0.14           |
| IML19A | QPD   | MBG                | 94,96,98, <b>102</b> ,114,115                    | 0.59                 | 2                | [68,72,97, <b>102</b> ,103] [41,43,47,127]          | 0.31; 0.12           |
| IML20A | QPD   | NGA                | 96,98,100, <b>103</b> ,115, <b>116</b> ,117      | 0.67                 | 2                | [71,74,77, <b>103</b> , <b>116</b> ] [41,43,47,128] | 0.22; 0.17           |
| IML21  | EPN   | MAN                | 97,99, <b>105</b> ,117,118,120                   | 0.92                 | 2                | [71,75,78,100, <b>105</b> ,106] [41,43,47,130]      | 0.22; 0.14           |
| IML22A | RPN   | NGA                | 65,98,100,102, <b>106</b> ,110,112,118,119       | 0.78                 | 2                | [72,76,101, <b>106</b> ,107] [41,43,47,131]         | 0.31; 0.13           |
| IML23A | EPN   | TRE                | 65,98,100,102, <b>106</b> ,112,118,119,124       | 0.87                 | 2                | [72,76,101, <b>106</b> ,107] [41,43,47,131]         | 0.48; 0.12           |
| IML1B  | QPD   | NGA                | 73,107,109,111, <b>115</b> ,119,121,127,128      | 0.52                 | 2                | [80,84,110, <b>115</b> ,116] [43,45,49,140]         | 0.15; 0.13           |
| IML2B  | KPD   | NGA                | 74,108,110,112, <b>116</b> ,120,122,128,129      | 0.71                 | 2                | [81,85,111, <b>116</b> ,117] [44,46,50,141]         | 0.42; 0.08           |
| IML3B  | QPD   | NGA                | 73,107,109,111, <b>114</b> ,118,120,126,127      | 0.81                 | 2                | [80,84,110, <b>114</b> ,115] [43,45,49,139]         | 0.27; 0.12           |
| IML4B  | QPD   | GQ2                | 62,105,107, <b>108</b> ,116,124,125,126,132      | 0.86                 | 2                | [78,82, <b>108</b> ,112,113] [43,45,49,137]         | 0.28,0.14            |
| IML5B  | QPD   | NGA                | 73,107,109,111, <b>115</b> ,119,121,127,128      | 0.80                 | 2                | [80,84,110, <b>115</b> ,116] [43,45,49]             | 0.35; 0.06           |
| IML6B  | EPN   | GQ2                | 73,104,106, <b>107</b> ,116,124,125,126,132      | 0.81                 | 2                | [80,84, <b>107</b> ,112,113] [43,45,49,137]         | 0.19; 0.13           |
| IML7B  | QPD   | GQ2                | 62,107,109, <b>110</b> ,119,127,128,129,135      | 0.85                 | 2                | [43,45,49,140] [80,84, <b>110</b> ,115,116]         | 0.15; 0.14           |
| IML8B  | QPD   | GQ2                | 62,107,109, <b>110</b> ,119,127,128,129,135      | 0.86                 | 2                | [43,45,49,140] [80,84, <b>110</b> ,115,116]         | 0.14; 0.14           |
| IML9B  | QPD   | TRE                | 73,107,109,111, <b>115</b> ,121,127,128,133      | 0.8                  | 2                | [80,84, <b>115</b> ,116] [43,45,49,140]             | 0.24; 0.15           |
| IML10B | QPD   | GQ2                | 73,107,109, <b>110</b> ,119,127,128,129,135      | 0.83                 | 2                | [80,84, <b>110</b> ,115,116] [43,45,49,140]         | 0.30; 0.12           |
| IML11B | QPD   | NGA                | 73,107,109,111, <b>116</b> ,120,122,128,129      | 0.77                 | 2                | [80,84,110, <b>116</b> ,117] [43,45,49,141]         | 0.34; 0.12           |
| IML12B | RRR   | GQ2                | 73,107,109,110,119,127,128,129,135               | 0.73                 | 1                | [43,45,49,140]                                      | 0.14                 |
| IML13B | QPD   | TRE                | 73,107,109,111, <b>115</b> ,121,127,128,133      | 0.78                 | 2                | [80,84,110, <b>115</b> ,116] [43,45,49,140]         | 0.46; 0.11           |
| IML14B | QPD   | GQ2                | 62,107,109, <b>110</b> ,120,128,129,130,136      | 0.83                 | 2                | [80,84, <b>110</b> ,116,117] [43,45,49,141]         | 0.25; 0.15           |
| IML15B | QPD   | GQ2                | 62,106,108,109,117,125,126,127,133               | 0.81                 | 1                | [43,45,49,138]                                      | 0.13                 |
| IML16B | EPD   | NGA                | 73,104,106,108, <b>112</b> ,116,118,124,125      | 0.79                 | 2                | [80,84,107, <b>112</b> ,113] [43,45,49,137]         | 0.21; 0.14           |
| IML17B | QPD   | GQ2                | 73,107, <b>109</b> ,110,118,126,127,128,134      | 0.82                 | 2                | [80,84, <b>109</b> ,114,115] [43,45,49,139]         | 0.20; 0.16           |
| IML18  | QPN   | NGA                | 58,92,94,96, <b>100</b> ,104,106,112,113         | 0.80                 | 1                | [65,69,95, <b>100</b> ,101]                         | 0.32                 |
| IML19B | QPD   | GQ2                | 72,106,108,109,117,125,126,127,133               | 0.82                 | 2                | [79,83,114] [43,45,49,138]                          | 0.30; 0.10           |
| IML20B | QPD   | 4RS                | 73,107,109, <b>114</b> ,120,126, <b>127</b> ,132 | 0.82                 | 2                | [80,84,87, <b>114</b> , <b>127</b> ] [43,45,49,139] | 0.34; 0.14           |
| IML22B | QPD   | NGA                | 73,107,109,111, <b>115</b> ,119,121,127,128      | 0.78                 | 2                | [80,84,110, <b>115</b> ,116] [43,45,49,140]         | 0.41; 0.12           |
| IML23B | QPD   | GQ2                | 62,107,109,110,119,127,128,129,135               | 0.84                 | 1                | [43,45,49,140]                                      | 0.11                 |
| CTL-X2 | QPN   | NGA                | 71,104,106,108,112,116,118,126,127               | 0.65                 | 1                | [46,48,52,140]                                      | 0.04                 |
| CTL-X4 | DNH   | MAN                | 94,96,98,123,124,125                             | 0.22                 | 1                | [39,41,45,136]                                      | 0.30                 |
| CTL-X6 | ?     | -                  | -                                                | -                    | 1                | [38,40,44,97]                                       | 0.18                 |

<sup>a</sup> : FUC, alpha-L-fucopyranose; MAN, alpha-D-mannose; TRE, trehalose; NGA, N-acetyl-D-galactosamine; GAL, beta-D-galactose; GQ2, a viral ligand of human herpesvirus 6 (HHV-6); MMA, methyl alpha-D-mannopyranoside; MBG, methyl-beta-galactose; 4RS, trehalose mono-butyrate.

<sup>b</sup>: C-score is the confidence score of the prediction. It is calculated through the COACH (<http://zhanglab.ccmb.med.umich.edu/COACH/>) and I-TASSER (<http://zhanglab.ccmb.med.umich.edu/I-TASSER/>) server. Value is in the range [0 - 1], wherein a higher value suggests a more reliable prediction.

Table S6. FPKM values of 32 *T. xiaojinensis* genes encoding CTLDP in ten libraries

| geneID                  | name   | CK      | RS      | Os12    | Os48    | Os72    | Os1y    | Cm12    | Cm48    | Cm72    | Ec      |
|-------------------------|--------|---------|---------|---------|---------|---------|---------|---------|---------|---------|---------|
| isotig04615_CTL1        | IML1   | 1.72    | 116.44  | 341.16  | 381.78  | 399.05  | 0.41    | 298.25  | 5768.7  | 5742.38 | 610.62  |
| isotig04304_CTL2        | IML2   | 6.96    | 96.39   | 523.09  | 85.74   | 101.93  | 4.89    | 684.03  | 4994.61 | 1007.56 | 542.48  |
| isotig03303_CTL3        | IML3   | 180.34  | 207.73  | 235.76  | 241.97  | 434.79  | 158.37  | 231.82  | 340.88  | 375.58  | 193.35  |
| isotig01895_CTL4        | IML4   | 527.37  | 1016.76 | 1193.28 | 946.94  | 1137.1  | 449.9   | 1502.21 | 1630.66 | 2813.89 | 928.42  |
| isotig01063_CTL5        | IML5   | 10.51   | 73.59   | 97.55   | 89.41   | 174.7   | 9.91    | 94.3    | 233.03  | 222.74  | 64.89   |
| comp112889_c0_seq1_CTL7 | IML6   | 9.24    | 20.58   | 20.65   | 22.03   | 44.41   | 6.64    | 15.84   | 21.13   | 35.28   | 17.47   |
| isotig04171_CTL8        | IML7   | 1124.16 | 606.27  | 308.4   | 259.69  | 174.74  | 984.79  | 746.4   | 177.4   | 49.85   | 1239.33 |
| isotig03362_CTL9        | IML8   | 1267.23 | 1272.77 | 1553.98 | 1522.19 | 998.01  | 1276.53 | 1394.59 | 1608.12 | 3560.94 | 1354.96 |
| comp119095_c0_seq1_CTL1 | IML9   | 1664.14 | 844.83  | 643     | 1390.3  | 893.5   | 1542.36 | 1000.97 | 737.65  | 519.7   | 1269.69 |
| isotig04092_CTL11       | IML10  | 44.42   | 752.76  | 763.96  | 236.02  | 424.53  | 42.79   | 1050.8  | 992.51  | 584.81  | 709.13  |
| comp123926_c0_seq2_CTL1 | IML11  | 0.04    | 2.18    | 6.75    | 2.88    | 20.64   | 0.22    | 15.35   | 15.07   | 9.95    | 9.87    |
| comp118822_c0_seq1_CTL1 | IML12  | 0.75    | 7.1     | 6.89    | 4.52    | 13.97   | 0.74    | 10.2    | 11.83   | 11.05   | 13.53   |
| isotig04145_CTL14       | IML13  | 104.92  | 237.84  | 193.92  | 268.07  | 383.33  | 88.89   | 193.73  | 158.04  | 218.33  | 210.43  |
| isotig01955             | IML14  | 652.18  | 923.07  | 900.47  | 847.22  | 1360.04 | 745.96  | 799.8   | 1096.28 | 1069.62 | 616.97  |
| isotig05113_CTL17       | IML15  | 0.51    | 3.48    | 13.89   | 36      | 10.58   | 0.24    | 2.61    | 2.98    | 80.76   | 33.01   |
| comp98872_c0_seq1       | IML16  | 1.08    | 2.14    | 12.93   | 5.77    | 0.29    | 1.25    | 0.93    | 1.55    | 4.68    | 2.36    |
| isotig01874_CTL20       | IML17  | 60.69   | 124.28  | 145.11  | 95.13   | 113.02  | 64.47   | 257.27  | 202.72  | 202.14  | 63.69   |
| comp148184_c0_seq1      | IML18  | 0.13    | 0.25    | 0.54    | 0       | 0.38    | 0.63    | 1.72    | 0.26    | 0.41    | 0.73    |
| comp81800_c0_seq1_CTL23 | IML19  | 0       | 0.12    | 0       | 0.07    | 0       | 0       | 0.12    | 0.25    | 0       | 3.15    |
| comp99460_c0_seq4_CTL24 | IML20  | 17.93   | 12.11   | 16.91   | 32.61   | 41.05   | 18.1    | 16.04   | 24.46   | 43.34   | 24.02   |
| comp102009_c0_seq2      | IML21  | 0.09    | 2.45    | 0.73    | 56.01   | 3.89    | 0       | 2.48    | 2.57    | 7.49    | 0.47    |
| isotig03477             | IML22  | 2.16    | 18.28   | 26.85   | 31.62   | 65.15   | 2.23    | 48.22   | 224.54  | 9.24    | 5.71    |
| isotig04483_CTL30       | IML23  | 151.96  | 295.51  | 210.39  | 114.89  | 229.47  | 151.08  | 258.58  | 307.94  | 412.14  | 164.05  |
| comp349455_c0_seq1      | CTL-S1 | 0.29    | 0.29    | 0.32    | 0.5     | 0       | 0       | 0.24    | 0.15    | 0.08    | 0.53    |
| comp95219_c0_seq1_CTL16 | CTL-S2 | 4.67    | 3.42    | 3.21    | 5.91    | 1.08    | 4.75    | 5.1     | 1.79    | 1.14    | 6.63    |
| comp73172_c0_seq1_CTL19 | CTL-S3 | 0.44    | 0.29    | 0.51    | 3.8     | 0       | 0.55    | 0.57    | 0       | 0.47    | 0.18    |
| comp120472_c0_seq1_CTL6 | CTL-S4 | 0.73    | 0.9     | 0.68    | 2.04    | 0.44    | 0.21    | 1.22    | 0.93    | 2.17    | 2.92    |
| comp184160_c0_seq1      | CTL-S5 | 0       | 0       | 1.45    | 4.24    | 0       | 0       | 0.73    | 0       | 3.13    | 0.06    |
| comp285015_c0_seq1_CTL2 | CTL-S6 | 0.27    | 0.18    | 0.71    | 1.69    | 0       | 0.08    | 0.17    | 0.07    | 1.88    | 0.59    |
| comp99293_c0_seq4_CTL25 | CTL-X2 | 0.45    | 0.67    | 1.04    | 2.15    | 2.02    | 0.39    | 0.8     | 0.53    | 2.73    | 1.55    |
| comp98113_c0_seq1       | CTL-X4 | 7.72    | 6.44    | 6.21    | 7.11    | 5.48    | 7.68    | 7.48    | 10.2    | 9.74    | 5.11    |

|                   |        |      |      |      |      |      |      |      |      |      |     |
|-------------------|--------|------|------|------|------|------|------|------|------|------|-----|
| comp77692_c0_seq1 | CTL-X6 | 0.41 | 0.44 | 0.55 | 1.29 | 0.34 | 0.12 | 0.42 | 1.08 | 0.35 | 0.8 |
|-------------------|--------|------|------|------|------|------|------|------|------|------|-----|
